## Microbiota and the gut–brain axis

John Bienenstock, Wolfgang Kunze, and Paul Forsythe

*Changes in gut microbiota can modulate the peripheral and central nervous systems, resulting in altered brain functioning, and suggesting the existence of a microbiota gut–brain axis. Diet can also change the profile of gut microbiota and, thereby, behavior. Effects of bacteria on the nervous system cannot be disassociated from effects on the immune system since the two are in constant bidirectional communication. While the composition of the gut microbiota varies greatly among individuals, alterations to the balance and content of common gut microbes may affect the production of molecules such as neurotransmitters, e.g., gamma amino butyric acid, and the products of fermentation, e.g., the short chain fatty acids butyrate, propionate, and acetate. Short chain fatty acids, which are pleomorphic, especially butyrate, positively influence host metabolism by promoting glucose and energy homeostasis, regulating immune responses and epithelial cell growth, and promoting the functioning of the central and peripheral nervous systems. In the future, the composition, diversity, and function of specific probiotics, coupled with similar, more detailed knowledge about gut microbiota, will potentially help in developing more effective diet- and drug-based therapies.*

### INTRODUCTION

The gut microbiota is composed of trillions of microbes that influence normal physiology and alter the host's susceptibility to disease.<sup>1</sup> A growing body of evidence in animals supports the concept that the gut microbiota influences emotional behavior.<sup>2–6</sup> Changes in the gut microbiota or intestinal exposure to specific bacteria can modulate the peripheral and central nervous systems (CNS) in animals, resulting in altered brain functioning and suggesting the existence of a microbiota gut–brain axis.<sup>7</sup> There is good evidence from animal studies that gut bacteria influence brain chemistry and development and that the enteric nervous system, including the sensory vagus nerve, appears to be able to differentiate between nonpathogenic and potentially pathogenic bacteria<sup>7</sup> and may play a critical role in mediating the effects

of gut microorganisms on behavior.<sup>7,8</sup> Because the nervous system has constant bidirectional communication with the immune system, the effects of bacteria on the nervous system cannot be disassociated from effects on the immune system. This type of crosstalk occurs regularly and can have profound neurological and immunological effects. However, the exact molecules responsible for host–microbe communication remain largely unknown.<sup>9</sup> Studies are currently addressing this neural circuitry and investigating the extent of the influence of gut microbiota on the CNS and on behavior,<sup>7</sup> as well as the therapeutic potential of probiotics for a range of immune disorders.<sup>10</sup> Microbiota products and metabolites also may promote metabolic benefits such as reduced body weight, reduced adiposity, improved glucose control, and improved insulin sensitivity via gut–brain neural circuits.<sup>11</sup>

Affiliation: J. Bienenstock, W. Kunze, and P. Forsythe are with the McMaster Brain-Body Institute at St Joseph's Healthcare Hamilton, Hamilton, Ontario, Canada. J. Bienenstock is with the Department of Pathology and Molecular Medicine, McMaster University, Hamilton, Ontario, Canada. W. Kunze is with the Department of Psychiatry and Behavioral Neurosciences, McMaster University, Hamilton, Ontario, Canada. P. Forsythe is with the Department of Medicine, McMaster University, Hamilton, Ontario, Canada.

Correspondence: J. Bienenstock, Professor of Medicine and Pathology, McMaster University, and Director, McMaster Brain-Body Institute, St Joseph's Healthcare Hamilton, 50 Charlton Ave. E, Hamilton, Ontario, Canada L8N4A6. E-mail: bienens@mcmaster.ca

Key words: behavior, brain, dysbiosis, gut, microbiota, probiotics.

©The Author(s) 2015. Published by Oxford University Press on behalf of the International Life Sciences Institute. All rights reserved. For Permissions, please e-mail: journals.permissions@oup.com.

## PROBIOTICS AND HEALTH

While the composition of the gut microbiota varies greatly among individuals, alterations to the balance of common gut microbes may affect production of the short-chain fatty acids (SCFAs), butyrate, propionate, and acetate, which are products of intestinal bacterial fermentation that regulate intestinal adaptive immune responses<sup>12</sup> and play key roles in CNS function.<sup>11,13,14</sup> Butyrate has direct effects on the growth, maturation, and functioning of gut epithelial cells,<sup>13</sup> on Treg cells of the immune system (regulatory T cells that play a key role in preventing autoimmunity), and on the nervous system, inhibiting IKCa (an intermediate conductance Ca activated K<sup>+</sup> channel).<sup>15</sup>

Germ-free mice have reduced concentrations of SCFAs compared with normal animals.<sup>12</sup> Smith et al.<sup>12</sup> fed germ-free mice SCFAs for 3 weeks and found that individual SCFAs or a combination of SCFAs increased immunoregulatory Treg cells. Ochoa-Reparaz et al.<sup>16,17</sup> found that *Bacteroides fragilis* or its exopolysaccharide, polysaccharide A (PSA), given to mice in experimental autoimmune encephalomyelitis models protected against CNS demyelinating disease both prophylactically and therapeutically.

A recent study also found that SCFAs, especially butyrate, positively influenced host metabolism by activating intestinal gluconeogenesis, both in insulin-sensitive and insulin-insensitive states, promoting glucose and energy homeostasis.<sup>11</sup> Diets high in nondigestible carbohydrates lower the pH in the proximal colon, which may be an important factor in butyrate production.<sup>13</sup> Propionate and acetate also have been found to promote satiety.<sup>18</sup> The metabolic benefits on body weight and glucose control induced by SCFAs or dietary fiber in normal mice are absent in mice deficient for intestinal gluconeogenesis, despite similar modifications in gut microbiota composition.<sup>11</sup> This finding suggests that while diet is a major factor in determining the composition of the gut microbiota and the production of SCFAs in mice, there is a strong interaction with genotype that influences outcomes.<sup>11</sup>

Altered gut microbiota can also be responsible for pathophysiology in the colon.<sup>19,20</sup> Gut microbiota–host misadaptation (dysbiosis) has been implicated in the rising incidence of inflammatory diseases such as inflammatory bowel disease.<sup>1</sup> Patients with inflammatory bowel disease or irritable bowel syndrome experience reduced levels of *Lactobacillus* and *Bifidobacterium* species in the gut.<sup>19,20</sup> Animal models indicate a role for bacteria in the adequacy of immune regulation and the development of intestinal inflammation. It is likely that reduced numbers and diversity of normal beneficial commensals such as lactobacilli and bifidobacteria play

an important role in allowing detrimental microbes such as *Citrobacter rodentium* and *Escherichia coli* access to the epithelial surface.<sup>21</sup> Disease improvement occurs following manipulation of the gut microbiota with *Lactobacillus rhamnosus* and *Lactobacillus helveticus* probiotics.<sup>21</sup> Animals administered *B. fragilis* or even PSA, which initiates beneficial immune responses, can be protected from experimental colitis.<sup>9</sup> Probiotics can also improve gut dysfunction induced by stress, in part, by normalization of hypothalamic–pituitary–adrenal axis (HPA) activity.<sup>21</sup>

## PROBIOTICS AND BEHAVIOR

The HPA reaction to stress is programmed in early life (at least in rodents). A landmark study from Japan demonstrated that early exposure to gut microbiota reduces the exaggerated HPA responses of germ-free mice in adulthood but not if given to adult animals.<sup>22</sup> Plasma ACTH and corticosterone levels were greater in response to stress in germ-free mice compared with specific pathogen-free mice.<sup>22</sup> Studies have shown similar results in normal, healthy mice and rats, i.e., that feeding a probiotic can attenuate the HPA axis response to stress.<sup>15,23,24</sup> Finally, it is important to recognize that stress itself has a major consequence on the composition and function of the gut microbiota.<sup>25</sup>

Mice fed *L. rhamnosus* JB-1 for 28 days experienced changes in certain Gamma amino butyric acid (GABA) receptors in different regions of the brain, increased anxiolytic behavior, and inhibition of corticosterone response to acute stress.<sup>23</sup> These changes were compatible with benzodiazepine effects. The neurochemical and behavioral effects were not found, however, in vagotomized animals, indicating that the vagus nerve is a major communication pathway between such bacteria in the gut and the brain.<sup>23</sup> Screening for this type of enteric nervous system activity could possibly provide potential treatments for anxiety and stress.

Recent unpublished research shows that the amount of the neurotransmitters GABA and glutamate can be increased in the brain by feeding the same probiotic bacteria to animals. However, the effects are limited, are time dependent, and depend on the continued presence of the starting probiotic.

It also has been demonstrated that when animals are fed *L. rhamnosus*, effects can be seen not only on the local nervous system but systemically as well.<sup>26</sup> Indeed, the intestinal microbiota can clearly influence brain chemistry and behavior in mice independent of the autonomic nervous system, gastrointestinal-specific neurotransmitters, or inflammation.<sup>27</sup> Fecal transplants from specific pathogen-free NIH Swiss mice, which are relatively not anxious, to BALB/c mice, which are

relatively anxious, surprisingly showed that the behavior of the animals was dependent on the source of fecal/microbiota material. Colonization of germ-free BALB/c mice with microbiota from NIH Swiss mice increased exploratory behavior, suggesting reduced anxiety, and increased hippocampal levels of brain-derived neurotrophic factor, which is important for the growth, differentiation, and maturation of neurons. In turn, colonization of germ-free NIH Swiss mice with BALB/c microbiota reduced exploratory behavior, suggesting an increase in anxiety. These changes were unaffected by vagotomy.

Diet can also change the profile of gut microbiota and, thereby, host behavior. Li et al.<sup>28</sup> showed that changing the composition of the diet of rodents altered the spatial memory of the recipients, indicating that nutrition and diet must be taken into account in such studies.

Research with a mutant bacteria devoid of PSA suggests that this component is necessary and sufficient for acute activation of intestinal sensory neurons, i.e., PSA can mimic the effects of the parent organism on the nervous system, much as it can mimic its immunological effects.<sup>9,29</sup> Thus, components of bacteria may themselves have the capacity to affect the functions of the nervous system. These findings support the concept that the luminal content of the gut and the bacteria contained within are important factors in determining behavior and even cognition in animals.<sup>27</sup>

## HUMAN RESEARCH

The strong evidence in animals of a direct link between the gut microbiota and the brain has led to the suggestion that the effect might be similar in humans. Bercik et al.<sup>27</sup> suggested that intestinal dysbiosis might contribute to psychiatric disorders in patients with bowel disorders. However, to date, there has been very little evidence in humans that probiotics will have the same neurochemical and behavioral effects observed in animals. In a double-blind, randomized, placebo-controlled study, Messaoudi et al.<sup>30</sup> administered a probiotic formula (*L. helveticus* and *Bifidobacterium longum*) to healthy women for 30 days and then assessed the recipients' level of anxiety and depression and 24-h urinary-free cortisol levels. In the female volunteers, daily administration of the probiotic formula alleviated psychological distress as indicated in 3 behavioral assessments, and 24-h urinary cortisol was reduced in the treated women.

In another clinical pilot study, 39 patients with a diagnosis of chronic fatigue syndrome were randomly assigned to receive *Lactobacillus casei* Shirota or a placebo daily for 2 months. There was a significant decrease in

anxiety symptoms in the treated group.<sup>31</sup> A more recent clinical study was performed in 23 healthy women volunteers with no gastrointestinal or psychiatric symptoms. The women were randomly assigned to groups given either a fermented milk product (*Bifidobacterium animalis*, *Streptococcus thermophilus*, *L. bulgaricus*, and *Lactococcus lactis*) or a placebo, which consisted of a nonfermented milk product adjusted for taste and texture, twice daily for 4 weeks.<sup>32</sup> Consumption of the fermented milk product had a robust effect on activity of the brain regions that control central processing of emotion and sensation, as observed with functional magnetic resonance imaging before and after consumption of the fermented milk product.

Some individuals diagnosed with autism spectrum disorders also display a spectrum of gastrointestinal abnormalities.<sup>33</sup> A recent study examined an animal model for the neurodevelopment disorders of autism in which pregnant mice were injected with a viral mimic (POLY I:C). This produced typical stereotypical autistic behaviors in the offspring that lasted into adulthood. Oral administration of *B. fragilis* to pregnant mice before and immediately after birth resulted in the development of significantly diminished autistic behaviors.<sup>33</sup> In this model, the administration of PSA did not prevent all of the abnormalities. However, the findings suggest that the incidence of viral infection over the course of pregnancy may produce lasting effects, which are potentially reversible by the oral administration of particular bacteria.

The findings of these clinical studies are consistent with the findings in rats and mice and suggest that the communication between gut microbiota and the brain is modifiable and may provide targets for the treatment of patients with heightened stress responses associated with gut dysbiosis.<sup>32</sup>

## CONCLUSION

The changes that occur in the microbial content of the gut as a result of ingestion of probiotic bacteria or changing the balance of gut microbiota in other ways can trigger a variety of mechanisms. These include effects on the host immune, nervous, and endocrine systems, which in turn affect each other, demonstrating an important role of the crosstalk between the gut and the host. Behavior, mood, and the response to stress can all be affected by the ingestion of probiotic bacteria. These data are very exciting and have aroused great popular and scientific interest. There is currently a significant gap between the experimental and clinical data. The challenge now is to translate these animal findings into clinical application. In the future, the composition, diversity, and function of specific probiotics, coupled

with more detailed knowledge of the composition of gut microbiota, could potentially help in developing more effective diet and drug therapies.

## Acknowledgments

The content of this article was presented as part of the Second Global Summit on the Health Benefits of Yogurt, held as a satellite to the Experimental Biology meeting in San Diego, California, on 30 April 2014. The conference was organized by the American Society for Nutrition and Danone Institute International. The supplement coordinators are Sharon M. Donovan, University of Illinois at Urbana-Champaign, USA, and Raanan Shamir, Schneider Children's Medical Center, Israel.

**Funding.** The authors gratefully acknowledge support and sponsorship provided by the Giovanni and Concetta Guglietti Family Foundation, National Science and Engineering Research Council (371955-2009 to W.K. and 371513-2009 to P.F.).

Writing and editorial assistance were provided by Densie Webb, PhD, RD, who was contracted and funded by Danone Institute International. J.B. received financial reimbursement for travel expenses and an honorarium from the Danone Institute International for participation in the conference.

**Declaration of interest.** The authors have no relevant interests to declare.

## REFERENCES

- Lozupone CA, Stombaugh JI, Gordon JI, et al. Diversity, stability and resilience of the human gut microbiota. *Nature*. 2012;489:220–230.
- Forsythe P, Sudo N, Dinan T, et al. Mood and gut feelings. *Brain Behav Immun*. 2010;24:9–16.
- Cryan JF, Dinan TG. Mind-altering microorganisms: the impact of the gut microbiota on brain and behaviour. *Nat Rev Neurosci*. 2012;13:701–712.
- Collins SM, Surette M, Bercik P. The interplay between the intestinal microbiota and the brain. *Nat Rev Microbiol*. 2012;10:735–42.
- Forsythe P, Kunze W. Voices from within: gut microbes and the CNS. *Cell Mol Life Sci*. 2013;70:55–69.
- Dinan TG, Stanton C, Cryan JF. Psychobiotics: a novel class of psychotropic. *Biol Psychiatry*. 2013;74:720–726.
- Forsythe P, Kunze WA, Bienenstock J. On communication between gut microbes and the brain. *Curr Opin Gastroenterol*. 2012;28:557–562.
- Diaz Heijtz R, Wang S, Anuar F, et al. Normal gut microbiota modulates brain development and behavior. *Proc Natl Acad Sci U S A*. 2011;108:3047–3052.
- Mazmanian SK, Round JL, Kasper DL. A microbial symbiosis factor prevents intestinal inflammatory disease. *Nature*. 2008;453:620–625.
- Forsythe P, Bienenstock J. Immunomodulation by commensal and probiotic bacteria. *Immunol Invest*. 2010;39:429–448.
- De Vadder F, Kovatcheva-Datchary P, Goncalves D, et al. Microbiota-generated metabolites promote metabolic benefits via gut-brain neural circuits. *Cell*. 2014;156:84–96.
- Smith PM, Howitt MR, Panikov N, et al. The microbial metabolites, short-chain fatty acids, regulate colonic Treg cell homeostasis. *Science*. 2013;341:569–573.
- Louis P, Flint HJ. Diversity, metabolism and microbial ecology of butyrate-producing bacteria from the human large intestine. *FEMS Microbiol Lett*. 2009;294:1–8.
- Schroeder FA, Lin CL, Crusio WE, et al. Antidepressant-like effects of the histone deacetylase inhibitor, sodium butyrate, in the mouse. *Biol Psychiatry*. 2007;62:55–64.
- Kunze WA, Mao YK, Wang B, et al. *Lactobacillus reuteri* enhances excitability of colonic AH neurons by inhibiting calcium-dependent potassium channel opening. *J Cell Mol Med*. 2009;13:2261–2270.
- Ochoa-Reparaz J, Mielcarz DW, Ditrlo LE, et al. Central nervous system demyelinating disease protection by the human commensal *Bacteroides fragilis* depends on polysaccharide A expression. *J Immunol*. 2010;185:4101–4108.
- Ochoa-Reparaz J, Mielcarz DW, Wang Y, et al. A polysaccharide from the human commensal *Bacteroides fragilis* protects against CNS demyelinating disease. *Mucosal Immunol*. 2010;3:487–495.
- Arora T, Sharma R, Frost G. Propionate. Anti-obesity and satiety enhancing factor? *Appetite*. 2011;56:511–515.
- Swidsinski A, Ladhoff A, Pernthaler A, et al. Mucosal flora in inflammatory bowel disease. *Gastroenterology*. 2002;122:44–54.
- Madden JA, Hunter JO. A review of the role of the gut microflora in irritable bowel syndrome and the effects of probiotics. *Br J Nutr*. 2002;88 (Suppl 1):S67–S72.
- Gareau MG, Jury J, MacQueen G, et al. Probiotic treatment of rat pups normalises corticosterone release and ameliorates colonic dysfunction induced by maternal separation. *Gut*. 2007;56:1522–1528.
- Sudo N, Chida Y, Aiba Y, et al. Postnatal microbial colonization programs the hypothalamic-pituitary-adrenal system for stress response in mice. *J Physiol*. 2004;558(Pt 1):263–275.
- Bravo JA, Forsythe P, Chew MV, et al. Ingestion of *Lactobacillus* strain regulates emotional behavior and central GABA receptor expression in a mouse via the vagus nerve. *Proc Natl Acad Sci U S A*. 2011;108:16050–16055.
- Ait-Belgnaoui A, Durand H, Cartier C, et al. Prevention of gut leakiness by a probiotic treatment leads to attenuated HPA response to an acute psychological stress in rats. *Psychoneuroendocrinology*. 2012;37:1885–1895.
- Lyte M. Microbial endocrinology and the microbiota-gut-brain axis. *Adv Exp Med Biol*. 2014;817:3–24.
- Forsythe P, Wang B, Khambati I, et al. Systemic effects of ingested *Lactobacillus rhamnosus*: inhibition of mast cell membrane potassium (IKCa) current and degranulation. *PLoS One*. 2012;7:e41234.
- Bercik P, Denou E, Collins J, et al. The intestinal microbiota affect central levels of brain-derived neurotrophic factor and behavior in mice. *Gastroenterology*. 2011;141:599–609, 609, e591–e593.
- Li W, Dowd SE, Scurlock B, et al. Memory and learning behavior in mice is temporally associated with diet-induced alterations in gut bacteria. *Physiol Behav*. 2009;96:557–567.
- Mao YK, Kasper DL, Wang B, et al. *Bacteroides fragilis* polysaccharide A is necessary and sufficient for acute activation of intestinal sensory neurons. *Nat Commun*. 2013;4:1465–1475.
- Messaoudi M, Lalonde R, Violle N, et al. Assessment of psychotropic-like properties of a probiotic formulation (*Lactobacillus helveticus* R0052 and *Bifidobacterium longum* R0175) in rats and human subjects. *Br J Nutr*. 2011;105:755–764.
- Rao AV, Bested AC, Beaulne TM, et al. A randomized, double-blind, placebo-controlled pilot study of a probiotic in emotional symptoms of chronic fatigue syndrome. *Gut Pathogens*. 2009;1:6–11.
- Tillisch K, Labus J, Kilpatrick L, et al. Consumption of fermented milk product with probiotic modulates brain activity. *Gastroenterology*. 2013;144:1394–1401, 1401, e1391–e1394.
- Hsiao EY. Immune dysregulation in autism spectrum disorder. *Int Rev Neurobiol*. 2013;113:269–302.
